# Supplementary material for: Standards as a Tool for Reducing Plastic Waste
Source: MDPI journal article supplement (doi:10.3390/su141710876), 2022-08-31
Supplement: s1 [file s1]

Archive with 2 entries (2 files):
- sustainability-1829580-Figure S1.pdf
- sustainability-1829580-supplementary.xlsx
