# Supplementary material for: Standards as a Tool for Reducing Plastic Waste
Source: MDPI journal article supplement (doi:10.3390/su141710876), 2022-08-31
Supplement: s1 [file s1 › sustainability-1829580-supplementary.xlsx]

## Sheet: Standards Mapping - Frame 1
Frame 1
European plastic packaging directive
CA rigid plastic packaging regulation
APCO packaging targets
Environmental aspects and guidelines for inclusion in standards ISO 17422
Environmental aspects and guidelines for inclusion in standards ISO 17422
Minimum recycled content in packaging (CR 13504)
Manufacturing
Guide for labeling plastics ISO 11469
Plastics vocabulary ISO 472:1999
Microbead legislation
Bag bans
Aus Standard or specification
CDL
Re-use
Consumer use
Reuse of packaging CEN 13429
Source reduction (CEN EN 13428)
Int Regulation1
Landfilll standards Council Directive 199/31/EC
Non-binding targets
European Landfill directive
Feedstock
Proposed Regulation
Requirements for packaging recoverable for energy CEN EN 13431:2004
Australasian recycling label
Disposal/ Source separation
Critieria for recycling methods EN 13437
Traceability of recycled content EN15343
Harmonised yellow bin guidelines
Specifications for biodegradable and compostable plastics ASTM D 5858, AS 4736, AS 5810
Specifications for compostable plastics ISO 17088, ISO 16929, EN 13432,
Guidelines for recovery of plastics - ISRI and ISO
Bale specifications - PP, Bottles, rigid scrap - APR
Mass balance method and certification
Waste reporting (CA AB901)
European waste framework directive
MRF certification
Facility/process standards
Material standards
Leakage to environment
APCO recovered polymer specs
ACOR specs
PET
LDPE
PP
PET
PVC bales
HDPE
HDPE
Standards for recucled plastic polymers - PS (EN 15342), PE (EN 15344), PP (EN 15345), PVC (EN 15346), PET (EN 15348, ISO 12418-1),
Classification for PE flim ASTM D 5491
Characterisation of plastic wastes (EN 15347)
Requirements for packaging to be classified as recoverable (EN 13430)

## Sheet: All standards
Category	Subcatetogy	Material/process	Secondary category	Standard Number	Standard title	Details	Standard/technical report	Country of origin
Overview	Standards			ISO 17422:2018	Plastics — Environmental aspects — General guidelines for their inclusion in standards	Provides a structure for inclusion of environmental aspects in standards for plastics products. It proposes an approach which is directed at minimizing any adverse environmental impact without detracting from the primary purpose of ensuring adequate fitness for use of the products under consideration. Intended primarily for use by standards writers. Over and above its primary purpose, however, th…	Standard	International
Overview	Standards		Recycling	ISO 15270:2008	ISO 15270:2008 Plastics — Guidelines for the recovery and recycling of plastics waste	ISO 15270:2008 provides guidance for the development of standards and specifications covering plastics waste recovery, including recycling. The standard establishes the different options for the recovery of plastics waste arising from pre-consumer and post-consumer sources. It also establishes the quality requirements that should be considered in all steps of the recovery process, and provides ge…	Standard	International
Overview	Standards	Packaging		ISO 18601:2013	Packaging and the environment — General requirements for the use of ISO standards in the field of packaging and the environment	ISO 18601:2013 specifies requirements and procedures for the other International Standards in this series on packaging and the environment: ISO 18602, ISO 18603, ISO 18604, ISO 18605, and ISO 18606.	Standard	International
Overview	Terminology	Packaging		ISO 21067-2:2015	Packaging — Vocabulary — Part 2: Packaging and the environment terms	defines terms used in the field of packaging and the environment. It does not include terminology already covered by ISO 21067‑1 or other International Standards such as ISO 14050.	Standard	International
Overview	Terminology			ISO 472:2013	Plastics - Vocabulary	ISO 472:2013 defines terms used in the plastics industry, including terms and definitions appearing in plastics standards (of ISO/TC 61) and general terms and definitions of polymer science used in all aspects of plastics technology. In addition to terms in English and French (two of the three official ISO languages), this vocabulary includes the equivalent terms in German; these have been includ…	Standard	International
Overview	Terminology			AS/NZS 3831:1998	Waste management - Glossary of terms	The definitions are aimed at generic waste rather than specific product groups, in order to be suitable to various industries and institutions as well as households.		Australian
Overview	Terminology			ASTM D883 - 20B	Standard terminology relating to plastic	This terminology covers definitions of technical terms used in the plastics industry. Terms that are generally understood or adequately defined in other readily available sources are not included.	Standard	International
Overview	Terminology			ASTM D1600-18	Terminology for Abbreviated Terms Relating to Plastics	The purpose of this terminology is to provide uniform contractions of terms relating to plastics. Abbreviated terminology has evolved through widespread common usage. This compilation has been prepared to avoid both the occurrence of more than one abbreviated term for a given plastics term and multiple meanings for abbreviated terms. NOTE 2: Many of the abbreviated terms, codes, numbers, and symb…	Standard	International
Overview	Terminology			ISO 1043 parts 1-4	Plastics — Symbols and abbreviated terms	ISO 1043-1:2011 defines abbreviated terms for the basic polymers used in plastics, symbols for components of these terms, and symbols for special characteristics of plastics. It includes only those abbreviated terms that have come into established use and its aim is both to prevent the occurrence of more than one abbreviated term for a given plastic and to prevent a given abbreviated term being i…	Standard	International
Overview				BSI 8001	Framework for implementing the principles of the circular economy in organisations	This British Standard is intended to help organizations and individuals consider and implement more circular and sustainable practices within their businesses, whether through improved ways of working, providing more circular products and services or redesigning their entire business model and value proposition.	Standard	British
Overview	Data/testing			ISO/TR 21960:2020	Plastics — Environmental aspects — State of knowledge and methodologies	This document summarizes current scientific literature on the occurrence of macroplastics and microplastics, in the environment and biota. It gives an overview of testing methods, including sampling from various environmental matrix, sample preparation and analysis. Further, chemical and physical testing methods for the identification and quantification of plastics are described.	Standard	International
Feedstock	Overview	Bioplastics		ISO 22526-1:2020	Plastics — Carbon and environmental footprint of biobased plastics — Part 1: General principles. Part 2: Material carbon footprint, amount (mass) of CO2 removed from the air and incorporated into polymer molecule	This document specifies the general principles and the system boundaries for the carbon and environmental footprint of biobased plastic products. This document is applicable to plastic products and plastic materials, polymer resins, which are based from biobased or fossil-based constituents.	Standard	International
Feedstock	Data/testing	Bioplastics		ISO 16620- parts 1 and 2:2015	Plastics — Biobased content — Part 1: General principles. Part 2: Determination of biobased carbon content	It specifies the general principles and the calculation methods for determining the amount of biobased content in plastic products. These calculation methods are based on the carbon mass or mass of each constituent present in the plastic products. ISO 16620-1:2015 is applicable to plastic products and plastic materials, polymer resins, monomers, or additives, which are made from biobased or fossi…	Standard	International
Design	Overview			ISO 14006:2020	Environmental management systems - Guidelines for incorporating ecodesign	Guidelines for assisting organizations in establishing, documenting, implementing, maintaining and continually improving their management of ecodesign as part of an environmental management system (EMS).	Standard	International
Design	Materials	Electrical/Electronic		IEC TR 62824:2016	Guidance on material efficiency considerations in environmentally conscious design of electrical and electronic products	A Technical Report that provides information on selection and efficient use of materials in electrical and electronic products	Technical report	International
Design	Materials	Packaging		ISO 18602:2013	Packaging and the environment — Optimization of the packaging system	ISO 18602:2013 specifies requirements and a procedure for assessment of packaging to ensure that the weight or volume of its material content is optimized consistent with the functions of packaging. This is one of several options for reducing the impact of packaging on the environment.	Standard	International
Design	Data/testing	Packaging		CEN EN 13428:2004:	Requirements specific to manufacturing and composition - Prevention by source reduction	This European Standard specifies a procedure for assessment of packaging to ensure that the weight and/or volume of its material content is at the minimum commensurate with the maintenance of : -functionality throughout the supply and user chain ;-safety and hygiene for both product and user/consumer ;-acceptability of the packed product to the user/consumer.	Standard	European
Manufacture	Data/testing			AS ISO/ASTM 52903.1:2021	Additive manufacturing - Material extrusion-based additive manufacturing of plastic materials, Part 1: Feedstock materials	describes a method for defining requirements for plastic materials used in extrusion-based additive manufacturing (AM) processes. It is intended for use by manufacturers of materials, feedstocks, plastic parts or any combination of the three using material extrusion-based AM. Identical adoption of ISO/ASTM 52903-1:2020	Standard	Australian adopted
Manufacture	Data/testing			ISO 11469:2016	Plastics — Generic identification and marking of plastics products	How to label plastics	Standard	International
Manufacture	Data/testing	Packaging		AS ISO 16103-2007	Transport packaging for dangerous goods - Recycled plastics material	Adopts ISO 16103:2005 as an Australian Standard. Specifies requirements and test methods for recycled plastics materials to be used as transport packagings for dangerous goods, including guidance on a quality assurance program	Standard	Australian adopted
Manufacture	Data/testing			IEC TR 62635:2012	Guidelines for end-of-life information provided by manufacturers and recyclers and for recyclability rate calculation of electrical and electronic equipment	provides a methodology for information exchange involving EEE manufacturers and recyclers, and for calculating the recyclability and recoverability rates	Technical report	International
Manufacture	Data/testing	Packaging		ISO/TR 18568:2021	Packaging and the environment — Marking for material identification	This document shows some examples of markings (words, numbers or symbols) for the identification of packaging materials. This document is applicable to all types of packaging in order to enable the identification of the materials used.	Technical report	International
Consumer Use	Data/testing			AS 14021:2018	Environmental labels and declarations - Self-declared environmental claims (Type II environmental labelling) (ISO 14021:2016 MOD)	Adopts ISO 14021:2016, which specifies requirements for self-declared environmental claims, including statements, symbols and graphics, regarding products. Describes selected terms commonly used in environmental claims and gives qualifications for their use.	Standard	Australian adopted
Reuse	Materials	Packaging	Design	ISO 18603:2013	Packaging and the environment - Reuse	It specifies the requirements for a packaging to be classified as reusable and sets out procedures for assessment of meeting the requirements, including the associated systems. The procedure for applying this International Standard is contained in ISO 18601.	Standard	International
Reuse	Materials	Electrical/Electronic		AS/NZS 5377-2021	Management of electrical and electronic equipment for re-use or recycling	AS 5377:2021 sets out principles and minimum requirements for the safe and environmentally sound collection and storage, transport, preparation for re-use and treatment of electrical and electronic equipment (including components, consumables and parts thereof) designed for a supply voltage not exceeding 1 000 V a.c. and 1 500 V d.c. Data security, traceability for substances of concern, risk man…	Standard	Australian
Reuse	Materials	Electrical/Electronic		AS/NZS 4701:2000	Requirements for domestic electrical appliances and equipment for reconditioning or parts recycling	Sets out general requirements applying to used domestic appliances intended for sale for reconditioning (reuse), salvaging of parts only (recycling), (or in New Zealand, historic collections), so that an appropriate safety outcome for the public is achieved without preventing the recycling or resale of electrical appliances or parts which may not be safe to use.	Standard	Australian
Reuse	Materials	Electrical/Electronic		IEC 63077:2019	Good refurbishment practices for medical imaging equipment	describes and defines the PROCESS of REFURBISHMENT of USED MEDICAL IMAGING EQUIPMENT and applies to the restoring of USED MEDICAL IMAGING EQUIPMENT to a condition of safety and performance comparable to that of new MEDICAL IMAGING EQUIPMENT	Standard	International
Reuse	Materials	Office equip		ISO/IEC 24700:2005	Quality and performance of office equipment that contains reused components	Specifies product characteristics for use in an original equipment manufacturer's or authorized third party's declaration of conformity to demonstrate that a marketed product that contains reused components performs equivalent to new	Standard	International
Reuse	Data/testing	Energy-related		EN 45556:2019 (and other 4555X standards)	General method for assessing the proportion of reused components in energy-related products	CEN-CENELEC. Allows manufacturers to compare circular features in products across different brands. They include several common definitions and calculation methods for aspects such as repairability, reusability and durability for “energy-related products”, a concept that includes a wide range of home appliances and ICT devices.	Standard	European
Recycling	Overview			ISO/TR 23891:2020	Plastics - Recycling and recovery - Necessity of standards	brief overview of the current (2019) situation in plastic recycling systems, relevant existing standards and short description of different recycling techniques.	Technical report	International
Recycling	Overview			CEN/TR 15353	Plastics — Recycled plastics — Guidelines for the development of standards for recycled plastics	This Technical Report provides a format for the drafting of standards for recycled plastics. It is intended for use by all those who are preparing drafts for consideration by the Technical Committee.	Technical report	European
Recycling	Data/testing	Packaging		EN 13440:2003	Packaging – Rate of recycling – Definition and method of calculation		Standard	European
Recycling	Data/testing			UL 2809	Environmental Claim Validation Procedure for Recycled Content	UL 2809 Environmental Claim Validation Procedure (ECVP) for Recycled Content is used to evaluate and validate defined source material content claims. Segregated material flows or mass balance accounting may be used when evaluating any defined source of material. The most recent update of the procedure includes assessments of the social impacts of collecting pre-consumer and post-consumer recycled…	Standard	International
Recycling	Data/testing			SCS Global Services Recycled Content Standard, V7.0	Third-party substantiation of recycled content claims – Qualifying and quantifying materials		Standard	International
Recycling	Data/testing			EN 15343	Plastics — Recycled plastics — Plastics recycling traceability and assessment of conformity and recycled content	Defines the procedures needed for the traceability of recycled plastics. This gives the basis for the calculation procedure for the recycled content of a product.	Standard	European
Recycling	Data/testing			EN 15347	Plastics — Recycled plastics — Characterisation of plastics wastes	BS EN 15347 is the European standard that provides a scheme for the characterisation of plastics wastes, laying out those properties for which the supplier of the waste shall make information available to the purchaser, and identifying test methods where applicable. The scheme provides for a division of information between "Required Data", where a statement is required, even if it is "unclassifie…	Standard	European
Recycling	Data/testing			CEN/TS 16010	Plastics — Recycled plastics — Sampling procedures for testing plastics waste and recyclates	This document specifies a system for sampling procedures for testing plastics waste and recyclates which take into account the specifics of the plastics waste and recyclates. It is intended to cover all stages of the plastic recycling process. The sampling procedures include the statistical specifics of the plastic waste and the behaviour of recyclates.	Standard	European
Recycling	Data/testing			CEN/TS 16011	Plastics. Recycled plastics. Sample preparation	Defines the preparation of samples of recycled plastics prior to testing and takes account of the specifics of the material.	Standard	European
Recycling	Collection/distribution	Baling		AS/NZS 4024.3702:2021	Safety of machinery, Part 3702: Machines for compacting waste materials or recyclable fractions - Horizontal baling presses - Safety requirements	Adopts EN 16252:2012 with modifications for Australia and New Zealand which specifies the safety requirements for the design, manufacture and information for safe use of horizontal baling presses for compacting waste material or recyclable fractions (e.g. paper, plastics, textiles, cans, cardboard, mixed waste)	Standard	Australian adopted
Recycling	Facility/process			EN 13437	Packaging and material recycling — Criteria for recycling methods — Description of recycling processes and flow chart	This European Standard defines the criteria for a recycling process and describes the principal existing processes for material recycling and their inter-relationship. Both packaging and recovery technologies are subject to continuing and rapid development.his European Standard describes the present stage of knowledge but may be subject to modifications in the light of new developments. The essen…	Standard	European
Recycling	Facility/process	Advanced Recycling		ISO/TR 16218:2013	Packaging and the environment — Processes for chemical recovery	Covers used packaging, although the processes described are not specific for used packaging and can be used for recovery of other materials of same type.	Technical report	International
Recycling	Facility/process	Contamination		ISO/TR 17098:2013	Packaging material recycling — Report on substances and materials which may impede recycling	Provides a non-exhaustive overview of substances and materials that can cause a sustained impediment to recycling activities and is intended to assist in the assessment requirements set out in ISO 18604.	Technical report	International
Recycling	Facility/process	Contamination		ASTM D5577 - 19	Standard Guide for Techniques to Separate and Identify Contaminants in Recycled Plastics	lists existing ASTM and ISO methods plus currently practiced industrial techniques for identification and classification of contaminants in recycled plastics flake or pellets.	Standard	International
Recycling	Facility/process	Contamination		CEN/TR 13688	Packaging - Material recycling - Report on requirements for substances and materials to prevent a sustained impediment to recycling	This Report provides some examples of substances and materials that may cause a sustained impediment in the recycling activities, and is intended to assist in the assessment requirements set out in the standard EN 13430. It describes substances or materials which cause problems or inhibit the recycling process, or which have a negative influence on the quality of recycled material, and for which …	Technical Report	European
Recycling	Facility/process	Contamination		ASTM D6288-17	Standard Practice for Separation and Washing of Recycled Plastics Prior to Testing	This practice describes a procedure for separating recycled plastics based on their color and a procedure for washing dirty, ground plastic, which results in separation of light materials (density <1.00 g/cm3). This practice is not intended to represent generic washing procedures used in the plastics recycling industry. The described procedures are solely for preparation of plastic samples for us…	Standard	International
Recycling	Facility/process	Contamination		ASTM D5814-18	Standard Practice for Determination of Contamination in RecycledPoly(Ethylene Terephthalate) (PET) Flakes and Chips Using a Plaque Test	This practice covers an indication of the quality of recycled transparent poly(ethylene terephthalate) by examination of a wafer or plaque formed by melting a representative sample and quenching it to prevent crystallization.	Standard	International
Recycling	Facility/process	Contamination		ASTM D5991-17	Standard Practice for Separation and Identification of Poly(Vinyl Chloride) (PVC) Contamination in Poly(Ethylene Terephthalate) (PET) Flake	This practice covers four procedures for separation and qualitative identification of poly(vinyl chloride) (PVC) contamination in poly(ethylene terephthalate) (PET) flakes.	Standard	International
Recycling	Facility/process	Contamination		ASTM D6265-17	Standard Practice for Separation of Contaminants in Polymers Using anExtruder Filter Test	This practice covers a means to separate the unmolten particles, gels, and impurities contaminating a polymer sample. The procedure may be used to remove gels and incompatible materials that may cause imperfections in the final extruded product. Under pressure, most gels will break up or deform and pass through a wire mesh filter, however high molecular weight gels may not break up or deform.	Standard	International
Recycling	Materials	Packaging	Design Manufacture	ISO 18604:2013	Packaging and the environment - Material recycling	ISO 18604:2013 specifies the requirements for packaging to be classified as recoverable in the form of material recycling while accommodating the continuing development of both packaging and recovery technologies and sets out procedures for assessment of meeting its requirements.	Standard	International
Recycling	Materials	Electrical/Electronic		VDI 2343 BLATT 1	Recycling of electrical and electronic products – Principles and terminology	As the terminology of recycling of used electrical and electronic equipment is not consistent in literature and practice, it has become necessary to define the pertinent terms with greater precesion in this guideline.	Standard	German
Recycling	Materials	PE		ASTM D 5491 : 2008 : R2014	ASTM D 5491 Standard Classification for Recycled Post-Consumer Polyethylene Film Sources for Moulding and Extrusion Materials	This classification identifies sources of PE film. The separation by sources also improves the usefulness of the material. Sources are post-consumer PE films from shrink wrap, dry cleaning film, merchandise bags, grocery sacks, stretch wrap, recycle bags, redemption bags, bubble packaging film, commercial/industrial liners/bags, and commercial overwrap	Standard	International
Recycling	Materials	PE		EN 15344	Plastics — Recycled plastics — Characterisation of polyethylene (PE) recyclates	This European Standard defines a method of specifying delivery conditions for polyethylene (PE) recyclates.	Standard	European
Recycling	Materials	PE, PP		ISO 18263-1:2015 and 2:2015	Plastics — Mixtures of polypropylene (PP) and polyethylene (PE) recyclate derived from PP and PE used for flexible and rigid consumer packaging — Part 1: Designation system and basis for specification. Part 2: Preparation of test specimens and determination of properties	ISO 18263-1:2015 establishes a system which can be used as the basis for specifications for mixtures of polypropylene (PP) and polyethylene (PE) recyclate. It covers mixtures of polypropylene (PP) and polyethylene (PE) recyclate derived from PP and PE used for flexible and rigid consumer packaging for moulding and extrusion. Recyclate from packaging used for the transport, handling, or storage of…	Standard	International
Recycling	Materials	PET		EN 15348	Plastics — Recycled plastics — Characterization of poly(ethylene terephthalate) (PET) recyclates	Describes a method of specifying delivery conditions for poly(ethylene terephthalate) (PET) recyclates.It gives the most important characteristics and associated test methods for assessing PET recyclates intended to be used for the production of semi-finished/finished products. It is intended for use by the supplier and purchaser of such materials, to assist them in agreeing on specifications. Th…	Standard	European
Recycling	Materials	PET		ISO 12418-1:2012	Plastics -- Post-consumer poly(ethylene terephthalate) (PET) bottle recyclates	ISO 12418-1:2012 establishes a designation system for post-consumer poly(ethylene terephthalate) (PET) bottle recyclates, which may be used as the basis for specifications.	Standard	International
Recycling	Materials	PET		ISO 13636:2012	Plastics — Film and sheeting — Non-oriented poly(ethylene terephthalate) (PET) sheets	This International Standard specifies the requirements and test methods for non-oriented polyethylene terephthalate (PET) or copolymer sheets made from virgin PET resin or recycled PET resin or combinations thereof. It applies only to sheets of thickness less than 2,0 mm. It excludes foamed sheets and shrinkable films.	Standard	International
Recycling	Materials	PP		EN 15345	Plastics — Recycled plastics — Characterisation of polypropylene (PP) recyclates	Describes a method of specifying delivery conditions for Polypropylene (PP) recyclates.	Standard	European
Recycling	Materials	PS		EN 15342	Plastics — Recycled plastics — Characterization of polystyrene (PS) recyclates	This European Standard defines a method of specifying delivery condition characteristics for polystyrene (PS) recyclates.	Standard	European
Recycling	Materials	PVC		EN 15346	Plastics — Recycled plastics — Characterisation of poly(vinyl chloride) (PVC) recyclates	This European Standard defines a method of specifying delivery conditions for poly(vinyl chloride) (PVC) recyclates.	Standard	European
Recycling	Materials			ISO 20819-1:2020	Plastics — Wood-plastic recycled composites (WPRC) — Part 1: Specification	This document specifies the types and proportions of raw materials to be used for wood-plastic recycled composites (hereafter referred to as WPRC). It also specifies the health and safety requirements for WPRC and the methods to test these properties	Specification	International
Recovery	Compostable		Design Manufacture	ISO 17088:2021	Plastics - Organic recycling - Specifications for compostable plastics	specifies procedures and requirements for plastics and products made from plastics that are suitable for recovery through organic recycling.	Standard	International
Recovery	Compostable	Packaging	Design Manufacture	ISO 18606:2013	Packaging and the environment — Organic recycling	Specifies procedures and requirements for packaging that are suitable for organic recycling	Standard	International
Recovery	Compostable			EN 13432	Packaging — Requirements for packaging recoverable through composting and biodegradation — Test scheme and evaluation criteria for the final acceptance of packaging	This European Standard specifies a procedure for assessment of packaging to ensure that the weight and/or volume of its material content is at the minimum commensurate with the maintenance of : -functionality throughout the supply and user chain ;-safety and hygiene for both product and user/consumer ;-acceptability of the packed product to the user/consumer.	Standard	European
Recovery	Compostable			ASTM D 6400	Standard Specification for Compostable Plastics	This specification covers plastics and products made from plastics that are designed to be composted in municipal and industrial aerobic composting facilities. The properties in this specification are those required to determine if plastics and products made from plastics will compost satisfactorily, including biodegrading at a rate comparable to known compostable materials. The purpose of this s…	Standard	International
Recovery	Compostable			AS 4736	Industrial Composting:	This Standard specifies requirements and procedures to determine the compostability, or anaerobic biodegradation, of plastics by addressing biodegradability, disintegration during biological treatment, effect on the biological treatment process and effect on the quality of the resulting compost. This Standard provides a basis to allow labelling of materials or products made from plastics as ‘comp…	Standard	Australian
Recovery	Compostable			ASTM D 6868	Standard Specification for Biodegradable Plastics Used as Coatings on Paper and Other Compostable Substrates	This specification establishes the requirements for labelling of materials and products (including packaging), wherein a biodegradable plastic film or coating is attached (either through lamination or extrusion directly onto the paper) to compostable substrates and the entire product or package is designed to be composted in municipal and industrial aerobic composting facilities. This specificati…	Standard	International
Recovery	Compostable			AS 5810	Home Compostability:	Specifies requirements and procedures to determine whether a plastic material is biodegradable in home composting conditions and provides the basis to allow labelling of materials or products made from plastics as home compostable, for use in home composting systems.	Standard	Australian
Recovery	Compostable			France 51-800	Plastics – Specifications for plastics suitable for home composting		Standard	French
Recovery	Compostable			BSI PAS 9017	Biodegradation of polyolefins in an open-air terrestrial environment	BSI. Testing plastic to prove it can break down into a harmless wax in the open air.	Standard	British
Recovery	Compostable		Data/testing	ISO 10210:2012	Plastics — Methods for the preparation of samples for biodegradation testing of plastic materials	ISO 10210:2012 describes methods for the preparation of test samples used in the determination of the ultimate aerobic and anaerobic biodegradability of plastic materials in an aqueous medium, soil, controlled compost or anaerobic digesting sludge. The methods described are designed to provide dimensional consistency of test samples, resulting in improved reproducibility of test results during th…	Standard	International
Recovery	Compostable		Data/testing	ISO 13975:2019	Plastics — Determination of the ultimate anaerobic biodegradation of plastic materials in controlled slurry digestion systems — Method by measurement of biogas production	This document specifies a method of evaluating the ultimate anaerobic biodegradability of plastic materials in a controlled anaerobic slurry digestion system with a solids concentration not exceeding 15 %, which is often found for the treatment of sewage sludge, livestock faeces or garbage. The test method is designed to yield a percentage and rate of conversion of the organic carbon in the test …	Standard	International
Recovery	Compostable		Data/testing	ISO 14851:2019	Determination of the ultimate aerobic biodegradability of plastic materials in an aqueous medium - Method by measuring the oxygen demand in a October 2019 V 1 Page 18 of 25 closed respirometer (ISO 14851:1999); German version EN ISO 14851:2004	This document specifies a method, by measuring the oxygen demand in a closed respirometer, for the determination of the degree of aerobic biodegradability of plastic materials, including those containing formulation additives. The test material is exposed in an aqueous medium under laboratory conditions to an inoculum from activated sludge. If an unadapted activated sludge is used as the inoculum…	Standard	International
Recovery	Compostable		Data/testing	ISO 14852:2021	Determination of the ultimate aerobic biodegradability of plastic materials in an aqueous medium - Method by analysis of evolved carbon dioxide (ISO 14852:2018); German version EN ISO 14852:2018	This document specifies a method, by measuring the amount of carbon dioxide evolved, for the determination of the degree of aerobic biodegradability of plastic materials, including those containing formulation additives. The test material is exposed in a synthetic medium under standardized laboratory conditions to an inoculum from activated sludge under aerobic conditions. The conditions used in …	Standard	International
Recovery	Compostable		Data/testing	ISO 14853:2016	Plastics — Determination of the ultimate anaerobic biodegradation of plastic materials in an aqueous system — Method by measurement of biogas production	ISO 14853:2016 specifies a method for the determination of the ultimate anaerobic biodegradability of plastics by anaerobic microorganisms. The conditions described in ISO 14853 do not necessarily correspond to the optimum conditions for the maximum degree of biodegradation to occur. The test calls for exposure of the test material to sludge for a period of up to 90 d, which is longer than the no…	Standard	International
Recovery	Compostable		Data/testing	ISO 14855:2012 Parts 1, 2	Determination of the ultimate aerobic biodegradability of plastic materials under controlled composting conditions — Method by analysis of evolved carbon dioxide — Part 1: General method. Part 2: Gravimetric measurement of carbon dioxide evolved in a laboratory-scale test (ISO 14855-2:2018); German version EN ISO 14855-2:2018	ISO 14855-1:2012 specifies a method for the determination of the ultimate aerobic biodegradability of plastics, based on organic compounds, under controlled composting conditions by measurement of the amount of carbon dioxide evolved and the degree of disintegration of the plastic at the end of the test. This method is designed to simulate typical aerobic composting conditions for the organic fra…	Standard	International
Recovery	Compostable		Data/testing	ISO 15985:2014	Plastics — Determination of the ultimate anaerobic biodegradation under high-solids anaerobic-digestion conditions — Method by analysis of released biogas	ISO 15985:2014 specifies a method for the evaluation of the ultimate anaerobic biodegradability of plastics based on organic compounds under high-solids anaerobic-digestion conditions by measurement of evolved biogas at the end of the test. This method is designed to simulate typical anaerobic digestion conditions for the organic fraction of mixed municipal solid waste. The test material is expos…	Standard	International
Recovery	Compostable		Data/testing	ISO 16929:2019	Plastics — Determination of the degree of disintegration of plastic materials under defined composting conditions in a pilot-scale test	This document defines a test method used to determine the degree of disintegration of plastic materials in a pilot-scale aerobic composting test under defined conditions. It forms part of an overall scheme for the evaluation of the industrial compostability of plastics as outlined in ISO 17088. The test method laid down in this document is also used to determine the influence of the test material…	Standard	International
Recovery	Compostable		Data/testing	ISO 17556:2019	Plastics — Determination of the ultimate aerobic biodegradability of plastic materials in soil by measuring the oxygen demand in a respirometer or the amount of carbon dioxide evolved	This document specifies a method for determining the ultimate aerobic biodegradability of plastic materials in soil by measuring the oxygen demand in a closed respirometer or the amount of carbon dioxide evolved. The method is designed to yield an optimum degree of biodegradation by adjusting the humidity of the test soil.	Standard	International
Recovery	Compostable		Data/testing	ISO 18830:2016	Plastics — Determination of aerobic biodegradation of non-floating plastic materials in a seawater/sandy sediment interface — Method by measuring the oxygen demand in closed respirometer	ISO 18830:2016 specifies a test method to determine the degree and rate of aerobic biodegradation of plastic materials when settled on marine sandy sediment at the interface between seawater and the seafloor, by measuring the oxygen demand in a closed respirometer.	Standard	International
Recovery	Compostable		Data/testing	ISO 19679:2020	Plastics - Determination of aerobic biodegradation of non-floating plastic materials in a seawater/sediment interface - Method by analysis of evolved carbon dioxide (ISO 19679:2016); German version EN ISO 19679:2017	This document specifies a test method to determine the degree and rate of aerobic biodegradation of plastic materials when settled on marine sandy sediment at the interface between seawater and the seafloor, by measuring the evolved carbon dioxide (CO2). This test method can also be applied to other solid materials. This test method is a simulation under laboratory conditions of the habitat found…	Standard	International
Recovery	Compostable		Data/testing	ISO 22404:2019	Plastics — Determination of the aerobic biodegradation of nonfloating materials exposed to marine sediment — Method by analysis of evolved carbon dioxide	This document specifies a laboratory test method to determine the degree and rate of aerobic biodegradation level of plastic materials. This test method can also be applied to other materials.	Standard	International
Recovery	Compostable		Data/testing	ISO 846:1997	Plastics — Evaluation of the action of microorganisms	This document specifies a method for determining the ultimate aerobic biodegradability of plastic materials under controlled composting conditions by gravimetric measurement of the amount of carbon dioxide evolved. The method is designed to yield an optimum rate of biodegradation by adjusting the humidity, aeration and temperature of the composting vessel. The method applies to the following mate…	Standard	International
Recovery	Compostable		Data/testing	ISO 20200:2015	Plastics — Determination of the degree of disintegration of plastic materials under simulated composting conditions in a laboratoryscale test	ISO 20200:2015 specifies a method of determining the degree of disintegration of plastic materials when exposed to a laboratory-scale composting environment. The method is not applicable to the determination of the biodegradability of plastic materials under composting conditions. Further testing is necessary to be able to claim compostability.	Standard	International
Recovery	Compostable	Mulch film	Manufacture Design	ISO 23517:2021	Plastics — Soil biodegradable materials for mulch films for use in agriculture and horticulture — Requirements and test methods regarding biodegradation, ecotoxicity and control of constituents	This document is applicable to biodegradable plastic materials used to produce mulch films or biodegradable mulch films ready to be used for mulch applications in agriculture and horticulture. This document specifies test methods and evaluation criteria by addressing the following characteristics: a) control of constituents; b) biodegradation; c) negative effects on terrestrial organisms. This do…	Standard	International
Recovery	Compostable		Data/testing	ASTM D6954-18	Standard Guide for Exposing and Testing Plastics that Degrade in the Environment by a Combination of Oxidation and Biodegradation	This guide provides a framework or road map to compare and rank the controlled laboratory rates of degradation and degree of physical property losses of polymers by thermal and photooxidation processes as well as the biodegradation and ecological impacts in defined applications and disposal environments after degradation. Disposal environments range from exposure in soil, landfill, and compost in…	Standard	International
Recovery	Compostable		Data/testing	ASTM D6691-17	Standard Test Method for Determining Aerobic Biodegradation of Plastic Materials in the Marine Environment by a Defined Microbial Consortium or Natural Sea Water Inoculum	This test method is used to determine the degree and rate of aerobic biodegradation of plastic materials (including formulation additives) exposed to pre-grown population of at least ten aerobic marine microorganisms of known genera or the indigenous population existing in natural seawater. The test method is conducted under controlled laboratory conditions.	Standard	International
Recovery	Compostable		Data/testing	ASTM D-5929-18	Standard Test Method for Determining Biodegradability of Materials Exposed to Source-Separated Organic Municipal Solid Waste Mesophilic Composting Conditions by Respirometry	This test method covers the biodegradation properties of a material by reproducibly exposing materials to conditions typical of source-separated organic municipal solid waste (MSW) composting. A material is composted under controlled conditions using a synthetic compost matrix and determining the acclimation time, cumulative oxygen uptake, cumulative carbon dioxide production, and percent of theo…	Standard	International
Recovery	Compostable		Data/testing	ASTM D5526-18	Standard Test Method for Determining Anaerobic Biodegradation of Plastic Materials Under Accelerated Landfill Conditions	This test method covers determination of the degree and rate of anaerobic biodegradation of plastic materials in an accelerated-landfill test environment. This test method is also designed to produce mixtures of household waste and plastic materials after different degrees of decomposition under conditions that resemble landfill conditions. The test materials are mixed with pretreated household w…	Standard	International
Recovery	Compostable		Data/testing	ASTM D7475-11	Standard Test Method for Determining the Aerobic Degradation and Anaerobic Biodegradation of Plastic Materials under Accelerated Bioreactor Landfill Conditions	This modification of Test Method D5526, which only considered anaerobic degradation, is used to determine the degree and rate of aerobic degradation (as indicated by loss of tensile strength, molecular weight, possibly resulting in disintegration and fragmentation) and anaerobic biodegradation of plastic materials in an accelerated bioreactor landfill test environment. It simulates the change fro…	Standard	International
Recovery	Compostable		Data/testing	BS 8472	Methods for the assessment of the oxo-biodegradation of plastics and of the phyto-toxicity of the residues in controlled laboratory conditions		Standard	British
Recovery	Compostable		Data/testing	DIN EN 14995	Plastics - Evaluation of compostability - Test scheme and specifications; German version EN 14995:2006	This European Standard specifies requirements and procedures to determine the compostability or anaerobic treatability of plastic materials by addressing four characteristics : 1) biodegradability; 2) disintegration during biological treatment; 3) effect on the biological treatment process; 4) effect on the quality of the resulting compost.	Standard	European
Recovery	Waste to Energy			ISO 21640:2021	Solid recovered fuels — Specifications and classes	This document specifies a classification system for solid recovered fuels (SRF), and a template containing a list of characteristics for the specification of their properties, enabling trade and use of SRF supporting the protection of the environment. SRF are produced from non-hazardous waste.	Standard	International
Recovery	Waste to Energy	Packaging	Manufacture Design	ISO 18605:2013	Packaging and the environment — Energy recovery	The guide provides information for the development of standards (guides, practices, test methods, and specifications) relating to the proper use of recycled plastics.	Standard	International
Recovery	Waste to Energy	Packaging	Design	CEN EN 13431:2004	Requirements for packaging recoverable in the form of energy recovery, including specification of minimum inferior calorific value	This European Standard specifies the requirements for a packaging to be classified as recoverable in the form of energy and sets out procedures for assessment of conformity with those requirements. The scope is limited to factors under the control of the supplier.	Standard	European
Disposal	Landfill			EN 14899:2005	Characterization of waste — Sampling of waste materials — Framework for the preparation and application of a Sampling Plan	This European Standard specifies the procedural steps to be taken in the preparation and application of a Sampling Plan.	Standard	International
