# Supplementary figures and images for: Standards as a Tool for Reducing Plastic Waste
Source: MDPI journal article supplement (doi:10.3390/su141710876), 2022-08-31

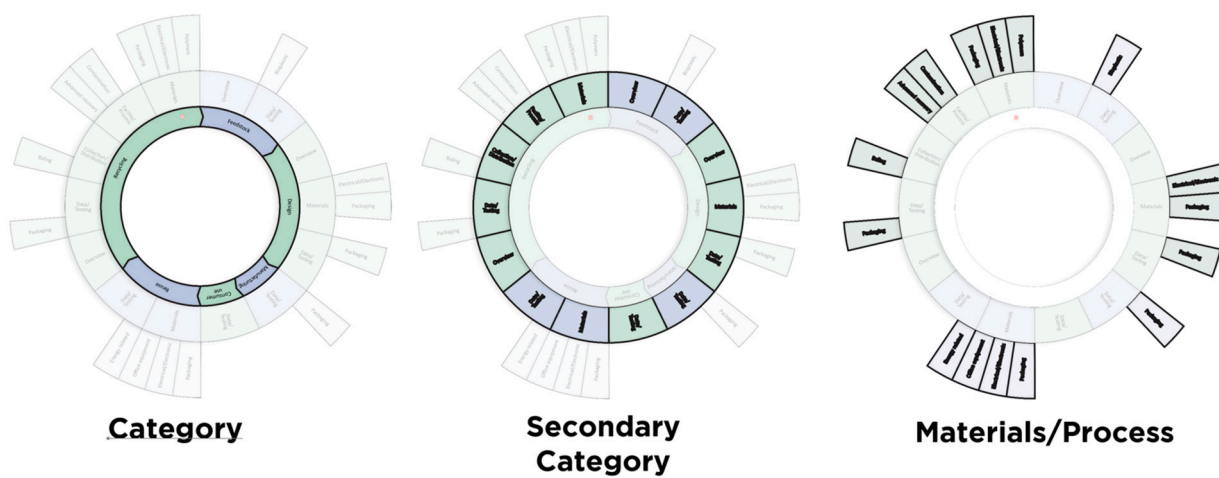

**Figure S1.** Key to match the categories in Table S1 with Figure 1.

Supplement: s1 [file s1]
